# Supplementary material for: Dioscin augments HSV-tk-mediated suicide gene therapy for melanoma by promoting connexin-based intercellular communication
Source: PubMed Central journal article supplement (PMC5352197; doi:10.18632/oncotarget.13655), 2016-11-26
Supplement: oncotarget-08-798-s001.pdf [file oncotarget-08-798-s001.pdf]

## Dioscin augments HSV-tk-mediated suicide gene therapy for melanoma by promoting connexin-based intercellular communication

### Supplementary Materials

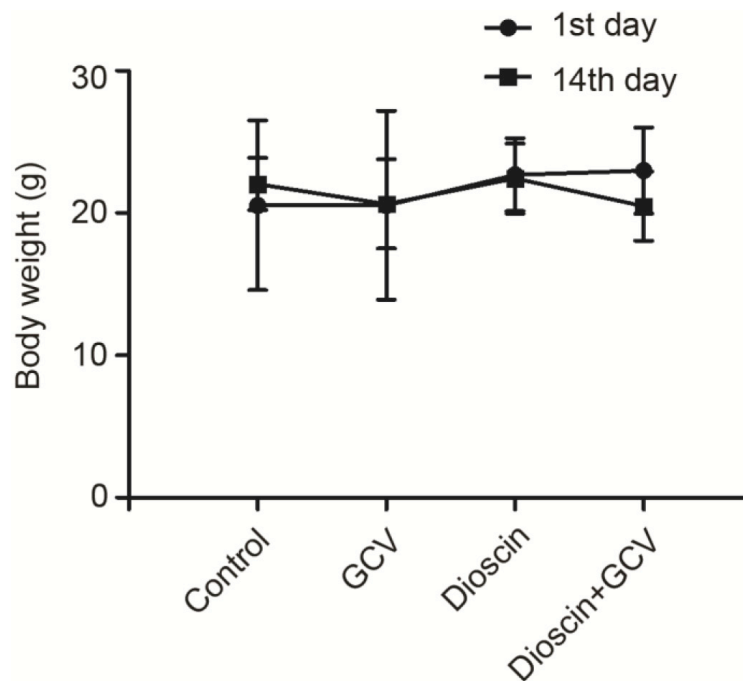

**Supplementary Figure S1: Body weight of the mice.** Mice bearing B16 tumors were randomized into four groups ( $n = 14$  mice per group): control, (saline only), GCV only (100 mg/kg•day), dioscin only (50 mg/kg•day), and GCV plus dioscin. Body weight of the mice was measured on day 1 and on day 14, respectively. Data are presented as the mean  $\pm$  standard deviation.
